# Supplementary material for: Revised Taxonomy of Rhabdoviruses Infecting Fish and Marine Mammals
Source: MDPI journal article supplement (doi:10.3390/ani12111363), 2022-05-26
Supplement: s1 [file s1]

**Table S1.** Percentage amino acid sequence divergence (p-distances) estimated from a CLUSTAL W alignment of perhabdovirus, cetarhavirus, siniperhavirus and scophrhavirus L proteins.

| Species                            |    | Virus                   | 1    | 2    | 3    | 4    | 5    | 6    | 7    | 8    | 9    | 10   | 11   | 12   | 13   | 14   | 15   | 16   | 17   | 18   | 19   | 20   | 21   | 22   | 23   | 24   | 25   | 26   | 27 |
|------------------------------------|----|-------------------------|------|------|------|------|------|------|------|------|------|------|------|------|------|------|------|------|------|------|------|------|------|------|------|------|------|------|----|
| <i>Perhabdovirus perca*</i>        | 1  | PRV_Dorson_JX679246     |      |      |      |      |      |      |      |      |      |      |      |      |      |      |      |      |      |      |      |      |      |      |      |      |      |      |    |
|                                    | 2  | PRV_16/065_MN964000     | 3.8  |      |      |      |      |      |      |      |      |      |      |      |      |      |      |      |      |      |      |      |      |      |      |      |      |      |    |
|                                    | 3  | PRV_P8350_MN963998      | 4.5  | 3.2  |      |      |      |      |      |      |      |      |      |      |      |      |      |      |      |      |      |      |      |      |      |      |      |      |    |
| <i>Perhabdovirus leman</i>         | 4  | LEMV_18/193_MN963996    | 14.8 | 13.4 | 13.1 |      |      |      |      |      |      |      |      |      |      |      |      |      |      |      |      |      |      |      |      |      |      |      |    |
| <i>Perhabdovirus trutta*</i>       | 5  | STRV_R6146_MN963999     | 19.8 | 18.8 | 18.5 | 18.3 |      |      |      |      |      |      |      |      |      |      |      |      |      |      |      |      |      |      |      |      |      |      |    |
|                                    | 6  | STRV_18/203_MN963997    | 20.0 | 19.1 | 18.7 | 18.4 | 5.2  |      |      |      |      |      |      |      |      |      |      |      |      |      |      |      |      |      |      |      |      |      |    |
|                                    | 7  | STRV_CH17_MN510774      | 20.0 | 19.0 | 18.6 | 18.3 | 5.0  | 0.9  |      |      |      |      |      |      |      |      |      |      |      |      |      |      |      |      |      |      |      |      |    |
| <i>Perhabdovirus anguilla*</i>     | 8  | EVA_J6B4_KC608038       | 29.4 | 28.6 | 28.2 | 27.6 | 28.1 | 27.7 | 27.7 |      |      |      |      |      |      |      |      |      |      |      |      |      |      |      |      |      |      |      |    |
|                                    | 9  | EVEX_CV1153311_FN557213 | 29.2 | 28.4 | 28.0 | 27.3 | 27.5 | 27.1 | 27.1 | 2.1  |      |      |      |      |      |      |      |      |      |      |      |      |      |      |      |      |      |      |    |
|                                    | 10 | EVEX_C30_JN639009       | 29.1 | 28.3 | 27.9 | 27.3 | 27.6 | 27.2 | 27.2 | 1.7  | 0.6  |      |      |      |      |      |      |      |      |      |      |      |      |      |      |      |      |      |    |
|                                    | 11 | EVEX_DF25/04_KC608037   | 29.2 | 28.4 | 28.0 | 27.4 | 27.7 | 27.2 | 27.2 | 2.1  | 0.9  | 0.4  |      |      |      |      |      |      |      |      |      |      |      |      |      |      |      |      |    |
|                                    | 12 | EVEX_DK3545_KC608034    | 29.2 | 28.3 | 28.0 | 27.3 | 27.7 | 27.2 | 27.2 | 1.8  | 0.9  | 0.3  | 0.7  |      |      |      |      |      |      |      |      |      |      |      |      |      |      |      |    |
|                                    | 13 | EVEX_DK3631_KC608035    | 29.3 | 28.5 | 28.1 | 27.5 | 27.8 | 27.3 | 27.3 | 2.2  | 1.1  | 0.6  | 1.0  | 0.8  |      |      |      |      |      |      |      |      |      |      |      |      |      |      |    |
|                                    | 14 | EVEX_DK5743_KC608036    | 29.1 | 28.3 | 27.9 | 27.3 | 27.6 | 27.2 | 27.2 | 1.8  | 0.7  | 0.1  | 0.5  | 0.3  | 0.7  |      |      |      |      |      |      |      |      |      |      |      |      |      |    |
|                                    | 15 | EVEX_GG129_JN639010     | 29.3 | 28.4 | 28.1 | 27.4 | 27.6 | 27.1 | 27.1 | 2.2  | 1.1  | 0.6  | 0.9  | 0.8  | 1.1  | 0.7  |      |      |      |      |      |      |      |      |      |      |      |      |    |
|                                    | 16 | EVEX_GG184_KC608033     | 29.3 | 28.4 | 28.1 | 27.4 | 27.6 | 27.1 | 27.1 | 2.2  | 1.2  | 0.6  | 0.9  | 0.8  | 1.1  | 0.8  | 0.0  |      |      |      |      |      |      |      |      |      |      |      |    |
|                                    | 17 | EVEX_JP77_JX827265      | 70.9 | 28.3 | 27.9 | 27.3 | 27.6 | 27.2 | 27.2 | 1.7  | 0.6  | 0.0  | 0.4  | 0.3  | 0.6  | 0.1  | 0.6  | 0.6  |      |      |      |      |      |      |      |      |      |      |    |
| <i>Cetarhavirus lagalorhynchus</i> | 18 | DRV_KF958252            | 44.7 | 43.8 | 44.2 | 44.3 | 45.0 | 44.3 | 44.6 | 44.1 | 44.1 | 44.3 | 44.2 | 44.3 | 44.4 | 44.3 | 44.3 | 44.3 | 44.3 |      |      |      |      |      |      |      |      |      |    |
| <i>Cetarhavirus phocoena</i>       | 19 | HPRV_MN103537           | 44.8 | 44.3 | 44.4 | 44.5 | 44.6 | 44.6 | 44.8 | 44.2 | 44.3 | 44.2 | 44.4 | 44.3 | 44.3 | 44.2 | 44.2 | 44.2 | 44.2 | 31.3 |      |      |      |      |      |      |      |      |    |
| <i>Siniperhavirus zoarcas</i>      | 20 | EPRV_KR612230           | 48.2 | 47.7 | 47.9 | 47.4 | 47.8 | 47.5 | 47.7 | 48.5 | 48.0 | 48.1 | 48.1 | 48.2 | 48.3 | 48.1 | 48.2 | 48.2 | 48.1 | 46.1 | 47.5 |      |      |      |      |      |      |      |    |
| <i>Siniperhavirus chuatsi</i>      | 21 | HSV_C1207_KC519324      | 48.2 | 47.8 | 47.7 | 47.9 | 47.8 | 47.6 | 47.6 | 48.7 | 48.4 | 48.4 | 48.4 | 48.4 | 48.4 | 48.4 | 48.4 | 48.4 | 48.4 | 45.8 | 46.0 | 28.8 |      |      |      |      |      |      |    |
|                                    | 22 | HSV_SHV19_MW291462      | 48.3 | 47.8 | 47.8 | 47.8 | 47.8 | 47.7 | 47.7 | 48.7 | 48.4 | 48.4 | 48.4 | 48.4 | 48.4 | 48.4 | 48.4 | 48.4 | 48.4 | 45.6 | 45.7 | 28.9 | 1.1  |      |      |      |      |      |    |
|                                    | 23 | CrERV_MH319839          | 48.0 | 47.7 | 47.5 | 47.7 | 47.6 | 47.5 | 47.5 | 48.5 | 48.2 | 48.2 | 48.2 | 48.2 | 48.2 | 48.2 | 48.2 | 48.2 | 48.2 | 45.8 | 46.0 | 29.2 | 2.4  | 2.8  |      |      |      |      |    |
|                                    | 24 | MSRV_MK397811           | 48.1 | 47.8 | 47.5 | 48.0 | 47.7 | 47.5 | 47.5 | 48.6 | 48.3 | 48.3 | 48.3 | 48.3 | 48.3 | 48.3 | 48.3 | 48.3 | 48.3 | 45.8 | 45.8 | 29.0 | 3.0  | 3.6  | 3.1  |      |      |      |    |
|                                    | 25 | SCRV_DQ399789           | 48.4 | 48.0 | 47.8 | 48.3 | 48.1 | 47.9 | 47.9 | 48.9 | 48.6 | 48.6 | 48.6 | 48.6 | 48.6 | 48.6 | 48.6 | 48.6 | 48.6 | 46.1 | 46.1 | 29.3 | 2.4  | 2.9  | 2.6  | 2.1  |      |      |    |
| <i>Scophrhavirus maximus</i>       | 26 | SMRV_HQ003891           | 53.4 | 52.8 | 53.1 | 53.4 | 52.9 | 53.1 | 53.2 | 53.8 | 53.7 | 53.6 | 53.6 | 53.6 | 53.7 | 53.6 | 53.5 | 53.5 | 53.6 | 53.2 | 53.3 | 54.0 | 53.5 | 53.6 | 53.4 | 53.4 | 53.5 |      |    |
| <i>Scophrhavirus chanodichthys</i> | 27 | WhRCDRV_MG600013        | 54.7 | 54.5 | 54.2 | 54.4 | 54.8 | 55.4 | 55.5 | 55.0 | 55.1 | 55.0 | 55.1 | 55.1 | 55.2 | 55.0 | 55.1 | 55.1 | 55.0 | 52.8 | 53.9 | 55.1 | 55.3 | 55.3 | 55.3 | 55.1 | 55.2 | 46.5 |    |

\*Existing species

**Table S2.** Percentage amino acid sequence divergence (p-distances) estimated from a CLUSTAL W alignment of perhabdovirus, cetarhavirus, siniperhavirus and scophrhavirus N proteins.

| Species                     |    | Virus                   | 1    | 2    | 3    | 4    | 5    | 6    | 7    | 8    | 9    | 10   | 11   | 12   | 13   | 14   | 15   | 16   | 17   | 18   | 19   | 20   | 21   | 22   | 23   | 24   | 25   | 26   | 27   | 28 |
|-----------------------------|----|-------------------------|------|------|------|------|------|------|------|------|------|------|------|------|------|------|------|------|------|------|------|------|------|------|------|------|------|------|------|----|
| Perhabdovirus perca*        | 1  | PRV_Dorson_JX679246     |      |      |      |      |      |      |      |      |      |      |      |      |      |      |      |      |      |      |      |      |      |      |      |      |      |      |      |    |
|                             | 2  | PRV_16/065_MN964000     | 2.7  |      |      |      |      |      |      |      |      |      |      |      |      |      |      |      |      |      |      |      |      |      |      |      |      |      |      |    |
|                             | 3  | PRV_P8350_MN963998      | 2.0  | 2.4  |      |      |      |      |      |      |      |      |      |      |      |      |      |      |      |      |      |      |      |      |      |      |      |      |      |    |
| Perhabdovirus leman         | 4  | LEMV_18/193_MN963996    | 15.9 | 17.4 | 16.1 |      |      |      |      |      |      |      |      |      |      |      |      |      |      |      |      |      |      |      |      |      |      |      |      |    |
| Perhabdovirus trutta*       | 5  | LTRV_AF434991           | 24.9 | 25.9 | 25.2 | 27.1 |      |      |      |      |      |      |      |      |      |      |      |      |      |      |      |      |      |      |      |      |      |      |      |    |
|                             | 6  | STRV_R6146_MN963999     | 24.9 | 25.9 | 25.2 | 27.4 | 0.5  |      |      |      |      |      |      |      |      |      |      |      |      |      |      |      |      |      |      |      |      |      |      |    |
|                             | 7  | STRV_18/203_MN963997    | 25.9 | 26.9 | 26.2 | 27.9 | 5.9  | 5.9  |      |      |      |      |      |      |      |      |      |      |      |      |      |      |      |      |      |      |      |      |      |    |
|                             | 8  | STRV_CH17_MN510774      | 26.2 | 26.9 | 26.4 | 28.1 | 6.1  | 6.1  | 1.5  |      |      |      |      |      |      |      |      |      |      |      |      |      |      |      |      |      |      |      |      |    |
| Perhabdovirus anguilla*     | 9  | EVA_J6B4_KC608038       | 37.7 | 37.2 | 37.7 | 38.6 | 39.9 | 40.1 | 40.1 | 40.3 |      |      |      |      |      |      |      |      |      |      |      |      |      |      |      |      |      |      |      |    |
|                             | 10 | EVEX_CV1153311_FN557213 | 37.7 | 37.2 | 37.7 | 38.6 | 39.9 | 40.1 | 40.1 | 40.3 | 1.5  |      |      |      |      |      |      |      |      |      |      |      |      |      |      |      |      |      |      |    |
|                             | 11 | EVEX_C30_JN639009       | 37.2 | 36.7 | 37.2 | 38.1 | 39.4 | 39.6 | 39.6 | 39.9 | 1.0  | 1.7  |      |      |      |      |      |      |      |      |      |      |      |      |      |      |      |      |      |    |
|                             | 12 | EVEX_DF25/04_KC608037   | 37.4 | 36.9 | 37.4 | 38.4 | 39.6 | 39.9 | 39.9 | 40.1 | 0.7  | 1.0  | 1.0  |      |      |      |      |      |      |      |      |      |      |      |      |      |      |      |      |    |
|                             | 13 | EVEX_DK3545_KC608034    | 37.2 | 36.7 | 37.2 | 38.1 | 39.1 | 39.4 | 39.4 | 39.6 | 1.2  | 1.7  | 0.7  | 1.0  |      |      |      |      |      |      |      |      |      |      |      |      |      |      |      |    |
|                             | 14 | EVEX_DK3631_KC608035    | 37.2 | 36.7 | 37.2 | 38.1 | 39.1 | 39.4 | 39.4 | 39.6 | 1.0  | 1.5  | 0.5  | 0.7  | 0.2  |      |      |      |      |      |      |      |      |      |      |      |      |      |      |    |
|                             | 15 | EVEX_DK5743_KC608036    | 37.2 | 36.7 | 37.2 | 38.1 | 39.1 | 39.4 | 39.4 | 39.6 | 1.2  | 1.7  | 0.7  | 1.0  | 0.0  | 0.2  |      |      |      |      |      |      |      |      |      |      |      |      |      |    |
|                             | 16 | EVEX_GG129_JN639010     | 37.4 | 36.9 | 37.4 | 38.4 | 39.4 | 39.6 | 39.6 | 39.9 | 0.7  | 1.0  | 1.0  | 0.2  | 0.7  | 0.5  | 0.7  |      |      |      |      |      |      |      |      |      |      |      |      |    |
|                             | 17 | EVEX_GG184_KC608033     | 37.4 | 36.9 | 37.4 | 38.4 | 39.4 | 39.6 | 39.6 | 39.9 | 0.7  | 1.0  | 1.0  | 0.2  | 0.7  | 0.5  | 0.7  | 0.0  |      |      |      |      |      |      |      |      |      |      |      |    |
|                             | 18 | EVEX_JP77_JX827265      | 37.2 | 36.7 | 37.2 | 38.1 | 39.4 | 39.6 | 39.6 | 39.9 | 0.7  | 1.5  | 0.2  | 0.7  | 0.5  | 0.2  | 0.5  | 0.7  | 0.7  |      |      |      |      |      |      |      |      |      |      |    |
| Cetarhavirus legalorhynchus | 19 | DRV_KF958252            | 58.7 | 58.7 | 59.4 | 59.7 | 58.2 | 57.9 | 58.7 | 58.9 | 60.6 | 60.6 | 60.4 | 60.4 | 60.4 | 60.4 | 60.4 | 60.4 | 60.4 | 60.4 |      |      |      |      |      |      |      |      |      |    |
| Cetarhavirus phocena        | 20 | HPRV_MN103537           | 57.7 | 57.2 | 57.2 | 57.2 | 55.7 | 56.0 | 57.0 | 56.7 | 56.5 | 56.2 | 56.2 | 56.2 | 56.2 | 56.2 | 56.2 | 56.2 | 56.2 | 56.2 | 31.8 |      |      |      |      |      |      |      |      |    |
| Siniperhavirus zoarces      | 21 | EPRV_KR612230           | 58.9 | 59.2 | 58.4 | 59.2 | 59.2 | 59.4 | 59.9 | 59.7 | 60.9 | 60.9 | 60.4 | 60.6 | 60.4 | 60.4 | 60.4 | 60.6 | 60.6 | 60.4 | 51.3 | 53.8 |      |      |      |      |      |      |      |    |
| Siniperhavirus chuatsi      | 22 | HSHV_C1207_KC519324     | 55.5 | 55.5 | 56.2 | 58.4 | 56.5 | 56.2 | 57.0 | 56.7 | 58.2 | 58.2 | 58.2 | 57.7 | 58.2 | 58.2 | 58.2 | 57.9 | 57.9 | 58.2 | 51.6 | 53.3 | 34.2 |      |      |      |      |      |      |    |
|                             | 23 | HSHV_SHVV19_MW291462    | 55.5 | 55.5 | 56.2 | 58.4 | 56.7 | 56.5 | 57.2 | 57.0 | 58.2 | 58.2 | 58.2 | 57.7 | 58.2 | 58.2 | 58.2 | 57.9 | 57.1 | 58.2 | 51.8 | 53.5 | 34.0 | 0.7  |      |      |      |      |      |    |
|                             | 24 | CRERV_MH319839          | 56.2 | 56.2 | 56.7 | 57.7 | 56.7 | 56.5 | 57.2 | 57.0 | 57.5 | 57.5 | 57.3 | 57.5 | 57.5 | 57.2 | 57.2 | 57.5 | 57.2 | 57.5 | 57.2 | 53.5 | 33.7 | 3.7  | 4.4  |      |      |      |      |    |
|                             | 25 | MSRV_MK397811           | 56.7 | 56.2 | 56.7 | 58.2 | 57.0 | 56.7 | 57.2 | 57.0 | 58.2 | 58.2 | 57.9 | 57.9 | 58.2 | 58.2 | 58.2 | 57.9 | 57.9 | 58.2 | 52.8 | 53.0 | 35.7 | 5.6  | 6.4  | 6.8  |      |      |      |    |
|                             | 26 | SCRV_DQ399789           | 56.5 | 56.0 | 56.7 | 58.2 | 57.0 | 56.7 | 57.7 | 57.5 | 58.7 | 58.7 | 58.2 | 58.4 | 58.4 | 58.4 | 58.4 | 58.4 | 58.4 | 58.4 | 51.8 | 53.8 | 34.7 | 3.4  | 4.2  | 4.2  | 4.4  |      |      |    |
| Scophrhavirus maximus       | 27 | SMRV_HQ003891           | 68.9 | 68.7 | 69.2 | 69.4 | 71.6 | 71.6 | 71.4 | 71.4 | 69.9 | 69.9 | 69.4 | 69.7 | 69.4 | 69.4 | 69.4 | 69.7 | 69.7 | 69.4 | 68.9 | 68.7 | 72.9 | 72.6 | 72.6 | 72.1 | 72.9 | 72.6 |      |    |
| Scophrhavirus chanodychthys | 28 | WhRCRDV_MG600013        | 70.2 | 69.4 | 70.2 | 71.6 | 71.1 | 70.9 | 70.7 | 70.9 | 70.4 | 69.9 | 69.9 | 70.2 | 69.9 | 69.9 | 69.9 | 70.2 | 70.2 | 69.9 | 69.7 | 70.4 | 71.9 | 69.9 | 69.7 | 70.2 | 69.9 | 69.7 | 62.6 |    |

\*Existing species

**Table S3.** Percentage amino acid sequence divergence (p-distances) estimated from a CLUSTAL W alignment of perhabdovirus, cetarhavirus, siniperhavirus and scophrhavirus G proteins.

| Species                      | Virus                      | 1    | 2    | 3    | 4    | 5    | 6    | 7    | 8    | 9    | 10   | 11   | 12   | 13   | 14   | 15   | 16   | 17   | 18   | 19   | 20   | 21   | 22   | 23   | 24   | 25   | 26   | 27   | 28 |  |
|------------------------------|----------------------------|------|------|------|------|------|------|------|------|------|------|------|------|------|------|------|------|------|------|------|------|------|------|------|------|------|------|------|----|--|
| Perhabdovirus perca*         | 1 PRV_Dorson_JX679246      |      |      |      |      |      |      |      |      |      |      |      |      |      |      |      |      |      |      |      |      |      |      |      |      |      |      |      |    |  |
|                              | 2 PRV_16/065_MN964000      | 3.3  |      |      |      |      |      |      |      |      |      |      |      |      |      |      |      |      |      |      |      |      |      |      |      |      |      |      |    |  |
|                              | 3 PRV_P8350_MN963998       | 1.8  | 3.1  |      |      |      |      |      |      |      |      |      |      |      |      |      |      |      |      |      |      |      |      |      |      |      |      |      |    |  |
| Perhabdovirus leman          | 4 LEMV_18/193_MN963996     | 16.9 | 18.0 | 16.7 |      |      |      |      |      |      |      |      |      |      |      |      |      |      |      |      |      |      |      |      |      |      |      |      |    |  |
| Perhabdovirus trutta*        | 5 LTRV_903/87_AF434991     | 30.4 | 31.0 | 30.8 | 32.4 |      |      |      |      |      |      |      |      |      |      |      |      |      |      |      |      |      |      |      |      |      |      |      |    |  |
|                              | 6 STRV_R6146_MN963999      | 30.2 | 31.0 | 30.6 | 32.0 | 4.3  |      |      |      |      |      |      |      |      |      |      |      |      |      |      |      |      |      |      |      |      |      |      |    |  |
|                              | 7 STRV_18/203_MN963997     | 32.0 | 32.2 | 32.0 | 31.8 | 10.4 | 11.6 |      |      |      |      |      |      |      |      |      |      |      |      |      |      |      |      |      |      |      |      |      |    |  |
|                              | 8 STRV_CH17_MN510774       | 32.0 | 32.7 | 32.0 | 31.8 | 9.6  | 11.0 | 2.7  |      |      |      |      |      |      |      |      |      |      |      |      |      |      |      |      |      |      |      |      |    |  |
| Perhabdovirus anguilla*      | 9 EVA_J6B4_KC608038        | 46.1 | 46.3 | 46.7 | 47.8 | 47.6 | 48.0 | 46.9 | 47.3 |      |      |      |      |      |      |      |      |      |      |      |      |      |      |      |      |      |      |      |    |  |
|                              | 10 EVEX_CV1153311_FN557213 | 45.9 | 46.7 | 46.5 | 48.0 | 47.3 | 47.6 | 47.6 | 47.6 | 3.3  |      |      |      |      |      |      |      |      |      |      |      |      |      |      |      |      |      |      |    |  |
|                              | 11 EVEX_C30_JN639009       | 45.9 | 46.7 | 46.5 | 48.0 | 47.6 | 47.8 | 47.8 | 47.8 | 3.3  | 0.4  |      |      |      |      |      |      |      |      |      |      |      |      |      |      |      |      |      |    |  |
|                              | 12 EVEX_DF25/04_KC608037   | 46.1 | 46.7 | 46.7 | 48.0 | 47.3 | 47.6 | 47.3 | 47.3 | 3.5  | 1.0  | 1.0  |      |      |      |      |      |      |      |      |      |      |      |      |      |      |      |      |    |  |
|                              | 13 EVEX_DK3545_KC608034    | 45.5 | 46.3 | 46.1 | 47.6 | 47.1 | 47.3 | 47.1 | 47.1 | 3.5  | 0.8  | 0.8  | 1.2  |      |      |      |      |      |      |      |      |      |      |      |      |      |      |      |    |  |
|                              | 14 EVEX_DK3631_KC608035    | 45.5 | 46.3 | 46.1 | 47.8 | 47.6 | 47.8 | 47.8 | 47.8 | 3.9  | 2.2  | 2.2  | 2.7  | 1.8  |      |      |      |      |      |      |      |      |      |      |      |      |      |      |    |  |
|                              | 15 EVEX_DK5743_KC608036    | 46.5 | 47.3 | 47.1 | 48.6 | 48.2 | 48.4 | 48.4 | 48.4 | 4.1  | 1.2  | 0.8  | 1.8  | 1.6  | 3.1  |      |      |      |      |      |      |      |      |      |      |      |      |      |    |  |
|                              | 16 EVEX_GG129_JN639010     | 46.1 | 46.9 | 46.7 | 48.0 | 47.6 | 47.8 | 47.8 | 47.8 | 3.7  | 0.8  | 0.8  | 1.4  | 1.2  | 2.7  | 1.6  |      |      |      |      |      |      |      |      |      |      |      |      |    |  |
|                              | 17 EVEX_GG184_KC608033     | 46.1 | 46.9 | 46.7 | 48.0 | 47.6 | 47.8 | 47.8 | 47.8 | 3.5  | 0.6  | 0.6  | 1.2  | 1.0  | 2.4  | 1.4  | 0.2  |      |      |      |      |      |      |      |      |      |      |      |    |  |
|                              | 18 EVEX_JP77_JX827265      | 45.9 | 46.7 | 46.5 | 48.0 | 47.3 | 47.6 | 47.3 | 47.3 | 3.3  | 0.2  | 0.4  | 1.0  | 0.8  | 2.2  | 1.2  | 0.8  | 0.6  |      |      |      |      |      |      |      |      |      |      |    |  |
| Cetarhavirus legallorhynchus | 19 DRV_KF958252            | 67.3 | 67.1 | 67.3 | 66.7 | 68.8 | 69.2 | 67.1 | 67.3 | 68.2 | 68.6 | 68.6 | 68.4 | 68.4 | 68.4 | 69.0 | 69.0 | 68.8 | 68.6 |      |      |      |      |      |      |      |      |      |    |  |
| Cetarhavirus phocoea         | 20 HPRV_MN103537           | 66.5 | 66.3 | 66.7 | 66.3 | 68.4 | 68.4 | 68.0 | 68.0 | 66.9 | 67.3 | 67.3 | 67.1 | 67.3 | 67.6 | 67.8 | 67.6 | 67.6 | 67.3 | 56.1 |      |      |      |      |      |      |      |      |    |  |
| Siniperhavirus zoarces       | 21 EPRV_KR612230           | 72.9 | 72.7 | 73.1 | 73.3 | 75.5 | 74.9 | 75.3 | 74.9 | 71.4 | 71.4 | 71.4 | 71.2 | 71.4 | 71.2 | 71.6 | 71.8 | 71.6 | 71.2 | 71.2 | 73.7 |      |      |      |      |      |      |      |    |  |
| Siniperhavirus chuatsi       | 22 HSHV_C1207_KC519324     | 73.1 | 73.1 | 73.3 | 72.7 | 73.1 | 72.7 | 73.5 | 73.7 | 72.7 | 72.4 | 72.4 | 72.2 | 72.2 | 72.0 | 72.7 | 72.7 | 72.4 | 72.4 | 69.4 | 70.4 | 50.4 |      |      |      |      |      |      |    |  |
|                              | 23 HSHV_SHVV19_MW291462    | 73.1 | 73.1 | 73.3 | 73.1 | 73.1 | 72.7 | 73.9 | 74.1 | 73.3 | 73.1 | 73.1 | 72.9 | 72.9 | 72.7 | 73.7 | 73.3 | 73.1 | 73.1 | 69.8 | 71.2 | 50.0 | 3.9  |      |      |      |      |      |    |  |
|                              | 24 CRERV_MH319839          | 72.7 | 72.7 | 72.9 | 72.4 | 73.7 | 73.5 | 74.3 | 74.5 | 72.9 | 72.7 | 72.7 | 72.7 | 72.4 | 72.2 | 72.9 | 72.9 | 72.7 | 72.7 | 70.0 | 71.2 | 50.0 | 8.6  | 10.6 |      |      |      |      |    |  |
|                              | 25 MSRV_MK397811           | 72.9 | 72.7 | 73.1 | 72.9 | 74.1 | 73.9 | 74.9 | 75.3 | 73.3 | 73.3 | 73.3 | 73.1 | 73.1 | 73.9 | 73.5 | 73.5 | 73.3 | 73.3 | 69.6 | 71.6 | 51.8 | 8.6  | 10.6 | 8.6  |      |      |      |    |  |
|                              | 26 SCRV_DQ399789           | 72.2 | 72.2 | 72.4 | 72.4 | 73.9 | 73.7 | 74.9 | 75.1 | 73.3 | 73.1 | 73.1 | 72.9 | 72.9 | 72.7 | 73.3 | 73.3 | 73.1 | 73.1 | 69.2 | 72.0 | 51.2 | 6.3  | 8.4  | 6.7  | 3.1  |      |      |    |  |
| Scophrhavirus maximus        | 27 SMRV_HQ003891           | 78.0 | 78.2 | 78.4 | 77.6 | 78.8 | 78.6 | 77.8 | 77.8 | 76.1 | 76.3 | 76.3 | 76.1 | 76.3 | 76.9 | 76.5 | 76.3 | 76.3 | 76.3 | 78.2 | 77.8 | 79.8 | 80.0 | 80.8 | 78.8 | 81.0 | 80.6 |      |    |  |
| Scophrhavirus chanodychthys  | 28 WnRCDRV_MG600013        | 74.4 | 73.9 | 74.7 | 75.1 | 75.1 | 75.5 | 75.5 | 75.3 | 74.9 | 74.5 | 74.5 | 74.3 | 74.3 | 74.3 | 75.1 | 74.7 | 74.7 | 74.5 | 76.7 | 77.8 | 79.0 | 79.0 | 78.8 | 78.6 | 78.8 | 79.4 | 71.0 |    |  |

\*Existing species
